# Supplementary material for: Erection pattern and section-wise wettability of honeybee glossal hairs in nectar feeding
Source: Oxford University Press journal article supplement (doi:10.1242/jeb.111013), 2015-01-09
Supplement: jeb111013_supp.pdf [file jeb111013_supp.pdf]

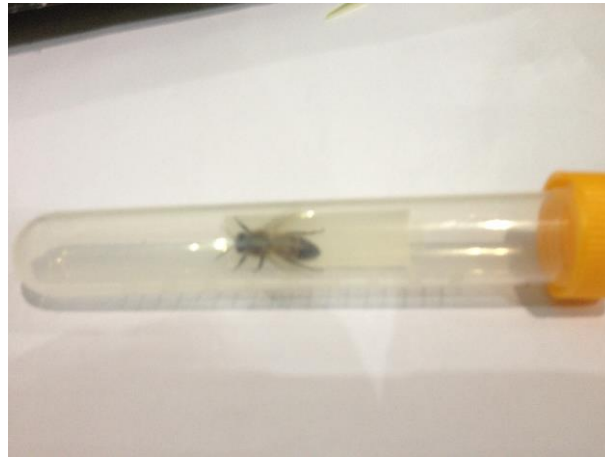

**Fig. S1. Honeybee specimen of *Apis mellifera ligustica*.**

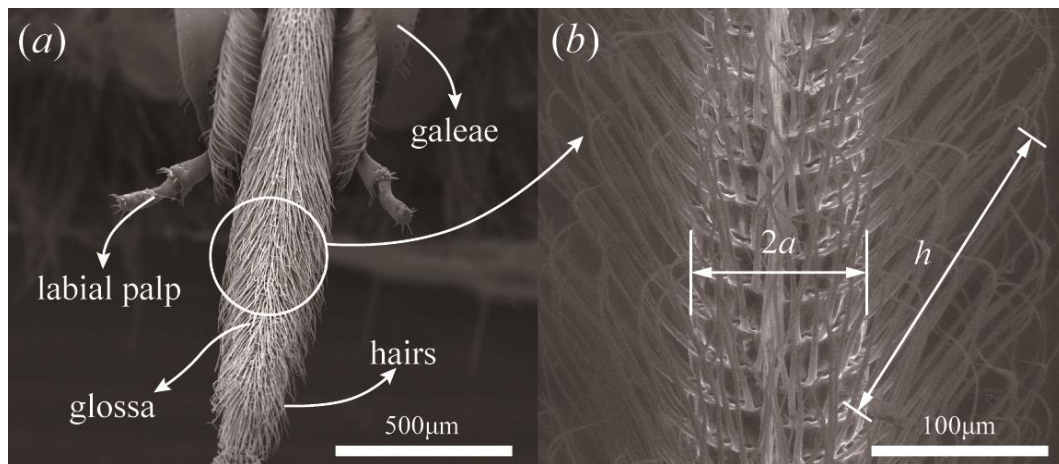

**Fig. S2. The honeybee's mouthpart.** (a) The mouthpart consists of a pair of labial palpi, a pair of galeae and a glossa covered by dense hairs. (b) The enlarged part of a typical glossa with bushy hairs. We measured and averaged lengths of the glossal hairs in Regions I-III. The lengths of the glossal hairs are  $109.47 \pm 8.96 \mu\text{m}$ ,  $110.57 \pm 5.97 \mu\text{m}$ ,  $126.61 \pm 13.73 \mu\text{m}$ , respectively.

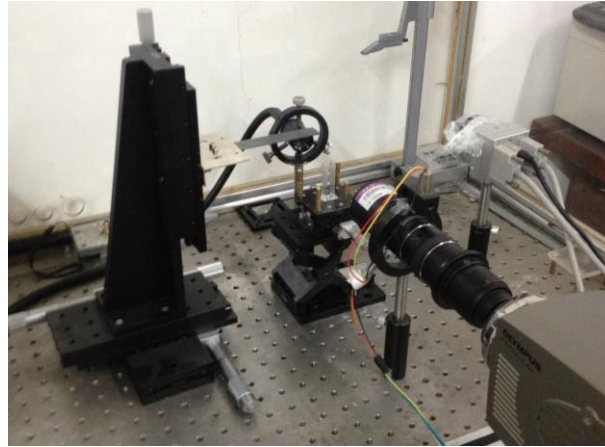

**Fig. S3. The experimental setup**

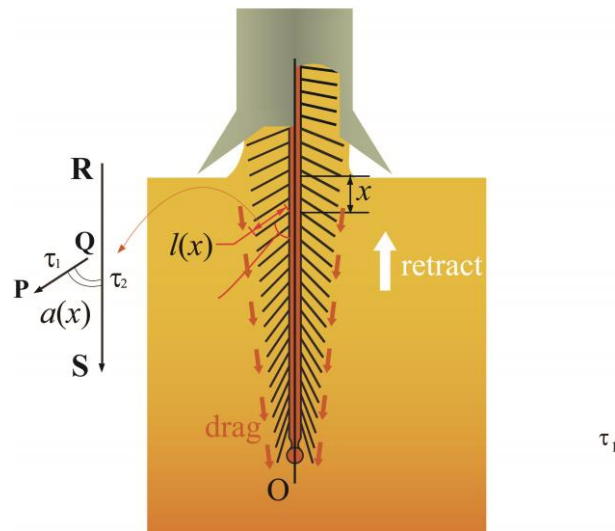

**Fig. S4. Calculation method of the erection angle.**

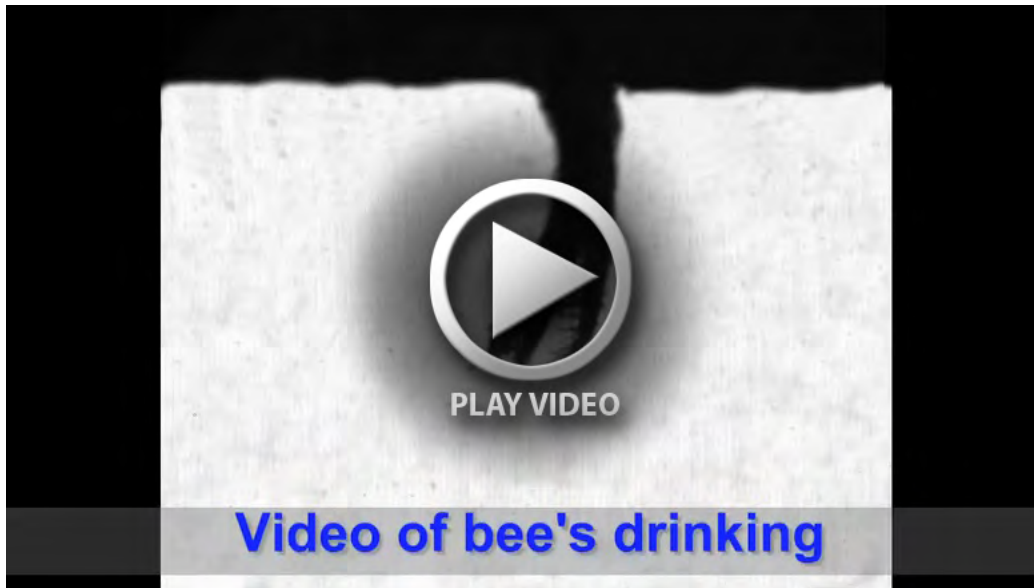

**Movie 1.** Dipping behaviour of a honeybee.

**Table S1.** Data of erection angles measured from high-speed images and then converted to real sizes

| $t / \text{ms}$ | Part A |         | Part B |         | Part C |         | Part D |         | Part E |         | Part F |         |
|-----------------|--------|---------|--------|---------|--------|---------|--------|---------|--------|---------|--------|---------|
|                 | Ave.   | St. Dev |
| 0               | 5.00   | 0.00    | 0.00   | 0.00    | 0.00   | 0.00    | 5.00   | 0.41    | 0.00   | 0.00    | 0.00   | 0.00    |
| 1               | 10.08  | 1.81    | 0.00   | 0.00    | 0.00   | 0.00    | 10.30  | 0.93    | 0.00   | 0.00    | 0.00   | 0.00    |
| 2               | 11.00  | 1.23    | 0.00   | 0.00    | 0.00   | 0.00    | 11.36  | 0.14    | 3.78   | 0.06    | 0.00   | 0.00    |
| 3               | 18.48  | 0.22    | 3.00   | 0.00    | 0.00   | 0.00    | 18.11  | 1.65    | 13.24  | 0.16    | 0.00   | 0.00    |
| 4               | 24.62  | 0.99    | 5.00   | 0.00    | 0.00   | 0.00    | 28.21  | 1.78    | 18.25  | 0.91    | 0.00   | 0.00    |
| 5               | 26.22  | 1.54    | 9.00   | 0.00    | 0.00   | 0.00    | 28.19  | 0.28    | 15.52  | 1.49    | 0.00   | 0.00    |
| 6               | 28.44  | 1.23    | 14.04  | 0.00    | 0.00   | 0.00    | 31.41  | 0.87    | 16.00  | 0.54    | 0.00   | 0.00    |
| 7               | 29.48  | 0.97    | 14.62  | 0.00    | 0.00   | 0.00    | 32.79  | 1.79    | 16.76  | 0.98    | 0.00   | 0.00    |
| 8               | 30.98  | 0.61    | 16.50  | 0.00    | 0.00   | 0.00    | 32.11  | 3.07    | 16.60  | 0.37    | 0.00   | 0.00    |
| 9               | 30.45  | 0.30    | 18.43  | 0.00    | 0.00   | 0.00    | 31.47  | 3.04    | 19.15  | 1.44    | 0.00   | 0.00    |
| 10              | 30.45  | 0.83    | 19.18  | 0.00    | 0.00   | 0.00    | 32.91  | 0.52    | 19.77  | 0.50    | 0.00   | 0.00    |
| 11              | 30.65  | 1.76    | 19.65  | 0.00    | 0.00   | 0.00    | 30.96  | 3.01    | 21.37  | 1.08    | 0.00   | 0.00    |
| 12              | 31.61  | 1.68    | 20.32  | 0.00    | 0.00   | 0.00    | 32.28  | 3.09    | 22.25  | 1.56    | 0.00   | 0.00    |
| 13              | 30.65  | 1.00    | 21.04  | 0.00    | 0.00   | 0.00    | 31.57  | 1.53    | 21.04  | 1.87    | 0.00   | 0.00    |
| 14              | 31.61  | 1.67    | 21.04  | 0.00    | 0.00   | 0.00    | 32.68  | 2.62    | 21.38  | 2.05    | 0.00   | 0.00    |
| 15              | 31.83  | 0.90    | 20.77  | 0.00    | 0.00   | 0.00    | 32.01  | 0.45    | 20.22  | 1.11    | 0.00   | 0.00    |
| 16              | 32.20  | 0.48    | 21.45  | 0.00    | 0.00   | 0.00    | 31.33  | 1.32    | 22.83  | 0.32    | 0.00   | 0.00    |
| 17              | 31.61  | 1.76    | 21.20  | 0.27    | 0.00   | 0.00    | 32.55  | 2.98    | 22.25  | 0.33    | 0.00   | 0.00    |
| 18              | 32.62  | 1.89    | 23.11  | 0.41    | 0.00   | 0.00    | 32.97  | 2.61    | 23.75  | 0.61    | 0.00   | 0.00    |
| 19              | 30.96  | 1.17    | 23.43  | 0.26    | 0.00   | 0.00    | 32.47  | 3.12    | 23.50  | 1.98    | 0.00   | 0.00    |
| 20              | 31.83  | 0.18    | 24.15  | 0.53    | 0.00   | 0.00    | 31.76  | 2.08    | 23.97  | 0.61    | 0.00   | 0.00    |
| 21              | 31.83  | 1.42    | 22.93  | 1.89    | 0.00   | 0.00    | 33.02  | 0.12    | 23.76  | 1.93    | 0.00   | 0.00    |
| 22              | 30.38  | 3.38    | 21.80  | 1.05    | 0.00   | 0.00    | 32.70  | 2.78    | 24.62  | 0.60    | 0.00   | 0.00    |
| 23              | 31.26  | 3.34    | 22.48  | 0.95    | 0.00   | 0.00    | 32.26  | 3.01    | 25.56  | 2.38    | 0.00   | 0.00    |
| 24              | 31.61  | 4.03    | 22.75  | 0.81    | 0.00   | 0.00    | 33.07  | 2.24    | 25.46  | 0.89    | 0.00   | 0.00    |
| 25              | 32.18  | 3.97    | 22.75  | 0.52    | 0.00   | 0.00    | 34.45  | 2.61    | 25.99  | 0.51    | 0.00   | 0.00    |

**Table S2. Contact angles at different regions of the bee tongue**

| concentration | A     |         | B     |         | C     |         | D     |         | E     |         | F     |         |
|---------------|-------|---------|-------|---------|-------|---------|-------|---------|-------|---------|-------|---------|
|               | Ave.  | St. Dev |
| 25%           | 55.55 | 0.70    | 48.20 | 1.20    | 41.95 | 0.90    | 51.94 | 0.70    | 49.23 | 0.40    | 36.91 | 0.70    |
| 35%           | 43.49 | 0.50    | 38.50 | 0.30    | 35.20 | 0.30    | 41.25 | 0.50    | 35.77 | 0.80    | 32.30 | 0.60    |
| 45%           | 42.02 | 0.50    | 36.82 | 0.80    | 29.21 | 0.50    | 35.74 | 0.30    | 31.6  | 0.40    | 24.70 | 1.00    |
